# Supplementary material for: Single-cell protein production by Pleurotus ostreatus in submerged fermentation
Source: Royal Society of Chemistry journal article supplement (doi:10.1039/d2fb00058j), 2023-01-01
Supplement: d2fb00058j1.pdf [file d2fb00058j1.pdf]

*Single-cell protein production by Pleurotus ostreatus in submerged fermentation*  
*electronic supplementary information (ESI)*

**Table 1.** Experimental conditions and results of screening design on the cultivation of *P. ostreatus*  
LGAM 1123

| <b>Exp No</b> | <b>Glucose<br/>(g L<sup>-1</sup>)</b> | <b>Yeast<br/>extract<br/>(g L<sup>-1</sup>)</b> | <b>NaN<sub>3</sub><br/>(g L<sup>-1</sup>)</b> | <b>pH</b> | <b>Cultivation<br/>time<br/>(days)</b> | <b>Biomass<br/>(g L<sup>-1</sup>)</b> | <b>Protein<br/>Content<br/>(%)</b> | <b>Protein<br/>production<br/>(g L<sup>-1</sup>)</b> |
|---------------|---------------------------------------|-------------------------------------------------|-----------------------------------------------|-----------|----------------------------------------|---------------------------------------|------------------------------------|------------------------------------------------------|
| <b>1</b>      | 4                                     | 1                                               | 0.4                                           | 5.0       | 16.0                                   | 2.6                                   | 30.3                               | 0.8                                                  |
| <b>2</b>      | 40                                    | 1                                               | 0.4                                           | 5.0       | 8.0                                    | 3.5                                   | 23.6                               | 0.8                                                  |
| <b>3</b>      | 4                                     | 10                                              | 0.4                                           | 5.0       | 8.0                                    | 6.0                                   | 36.1                               | 2.2                                                  |
| <b>4</b>      | 40                                    | 10                                              | 0.4                                           | 5.0       | 16.0                                   | 15.4                                  | 41.0                               | 6.3                                                  |
| <b>5</b>      | 4                                     | 1                                               | 4.0                                           | 5.0       | 8.0                                    | 2.8                                   | 26.5                               | 0.7                                                  |
| <b>6</b>      | 40                                    | 1                                               | 4.0                                           | 5.0       | 16.0                                   | 17.7                                  | 36.6                               | 6.5                                                  |
| <b>7</b>      | 4                                     | 10                                              | 4.0                                           | 5.0       | 16.0                                   | 4.1                                   | 19.8                               | 0.8                                                  |
| <b>8</b>      | 40                                    | 10                                              | 4.0                                           | 5.0       | 8.0                                    | 22.5                                  | 25.8                               | 5.8                                                  |
| <b>9</b>      | 4                                     | 1                                               | 0.4                                           | 7.0       | 8.0                                    | 2.9                                   | 27.7                               | 0.8                                                  |
| <b>10</b>     | 40                                    | 1                                               | 0.4                                           | 7.0       | 16.0                                   | 2.9                                   | 28.6                               | 0.8                                                  |
| <b>11</b>     | 4                                     | 10                                              | 0.4                                           | 7.0       | 16.0                                   | 2.7                                   | 7.1                                | 0.2                                                  |
| <b>12</b>     | 40                                    | 10                                              | 0.4                                           | 7.0       | 8.0                                    | 21.7                                  | 26.5                               | 5.7                                                  |
| <b>13</b>     | 4                                     | 1                                               | 4.0                                           | 7.0       | 16.0                                   | 1.9                                   | 29.5                               | 0.6                                                  |
| <b>14</b>     | 40                                    | 1                                               | 4.0                                           | 7.0       | 8.0                                    | 2.7                                   | 29.0                               | 0.8                                                  |
| <b>15</b>     | 4                                     | 10                                              | 4.0                                           | 7.0       | 8.0                                    | 6.5                                   | 56.9                               | 3.7                                                  |
| <b>16</b>     | 40                                    | 10                                              | 4.0                                           | 7.0       | 16.0                                   | 14.8                                  | 37.1                               | 5.5                                                  |
| <b>17</b>     | 22                                    | 5.5                                             | 2.2                                           | 6.0       | 12.0                                   | 9.3                                   | 29.0                               | 2.7                                                  |
| <b>18</b>     | 22                                    | 5.5                                             | 2.2                                           | 6.0       | 12.0                                   | 10.0                                  | 27.0                               | 2.7                                                  |
| <b>19</b>     | 22                                    | 5.5                                             | 2.2                                           | 6.0       | 12.0                                   | 10.2                                  | 28.5                               | 2.9                                                  |

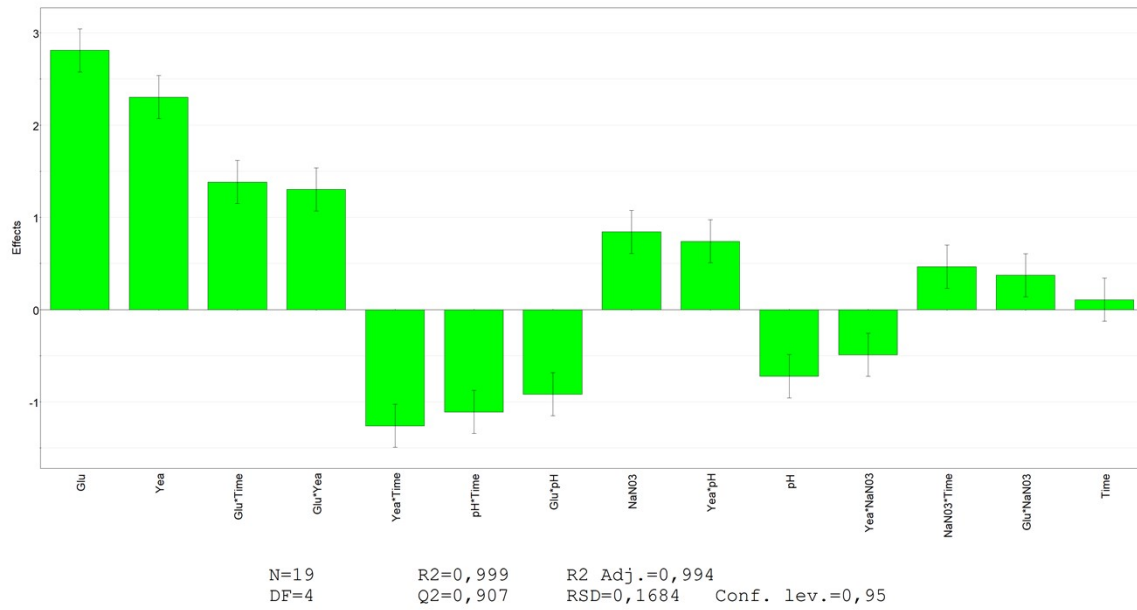

**Fig. 1** Effect bar plot for cultivation conditions used in the screening for protein production by *P. ostreatus* LGAM 1123. Insignificant, those where the confidence interval includes zero ( $p>0.05$ ).

**Table 2** Analysis of variance (ANOVA) for the regression model describing protein production as a function of different cultivation conditions in submerged cultivation of *P. ostreatus* 1123

| Protein production                                                         | DF | SS   | MS (variance) | F  | p           |
|----------------------------------------------------------------------------|----|------|---------------|----|-------------|
| <b>Regression</b>                                                          | 5  | 21   | 4             | 28 | <b>0.00</b> |
| <b>Residual</b>                                                            | 5  | 0.75 | 0.15          |    |             |
| <b>Lack of Fit (Model Error)</b>                                           | 3  | 0.59 | 0.20          | 2  | <b>0.31</b> |
| <b>Pure Error (Replicate Error)</b>                                        | 2  | 0.17 | 0.08          |    |             |
| <b>Total Corrected</b>                                                     | 10 | 22   | 2             |    |             |
| <b>R2 =0.966 F<sub>(0.95,5,5)</sub>=5.05; F<sub>(0.95,3,2)</sub>=19.16</b> |    |      |               |    |             |

Table 3 Analysis of variance (ANOVA) for the regression model of RSM representing protein production by *P. ostreatus* LGAM 1123.

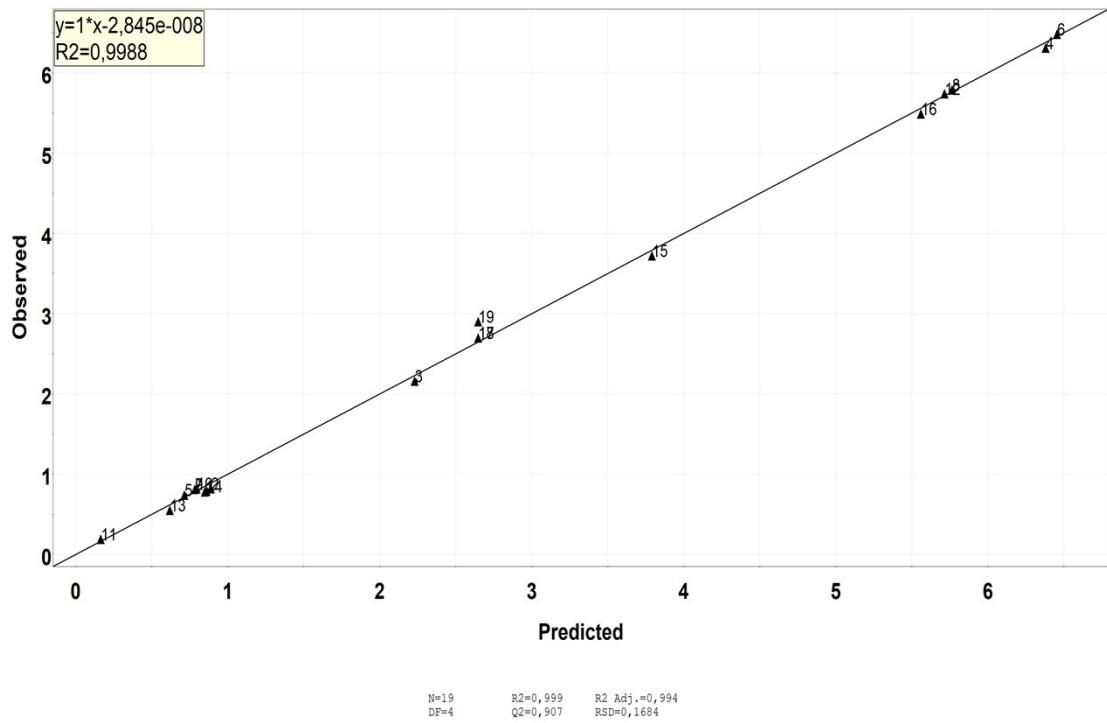

Fig. 2 Observed vs predicted values of RSM representing protein production by *P. 1123*. The continuous line represents the correlation between measured and simulated values.

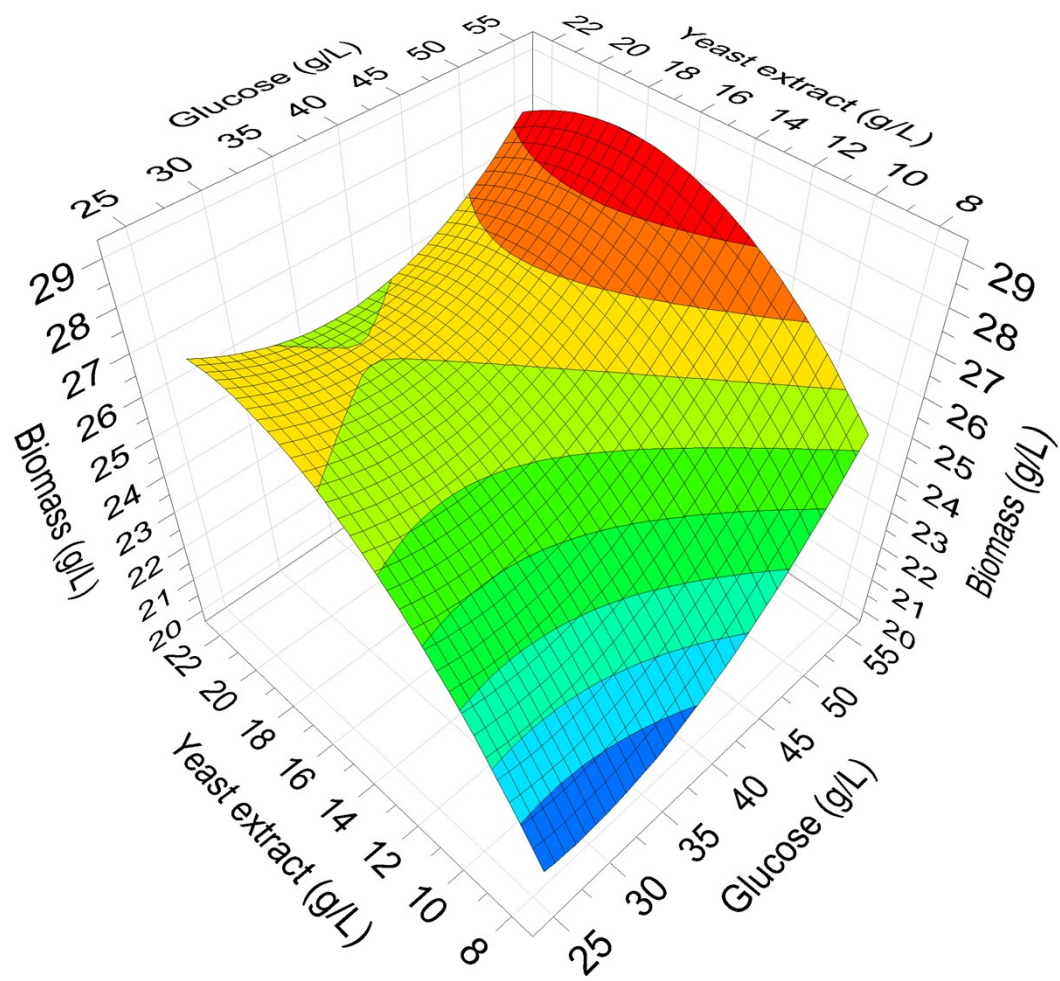

**Fig. 3** 3D surface plot of biomass production as a function of glucose and yeast extract concentration from submerged cultivation of *P. ostreatus* LGAM 1123.

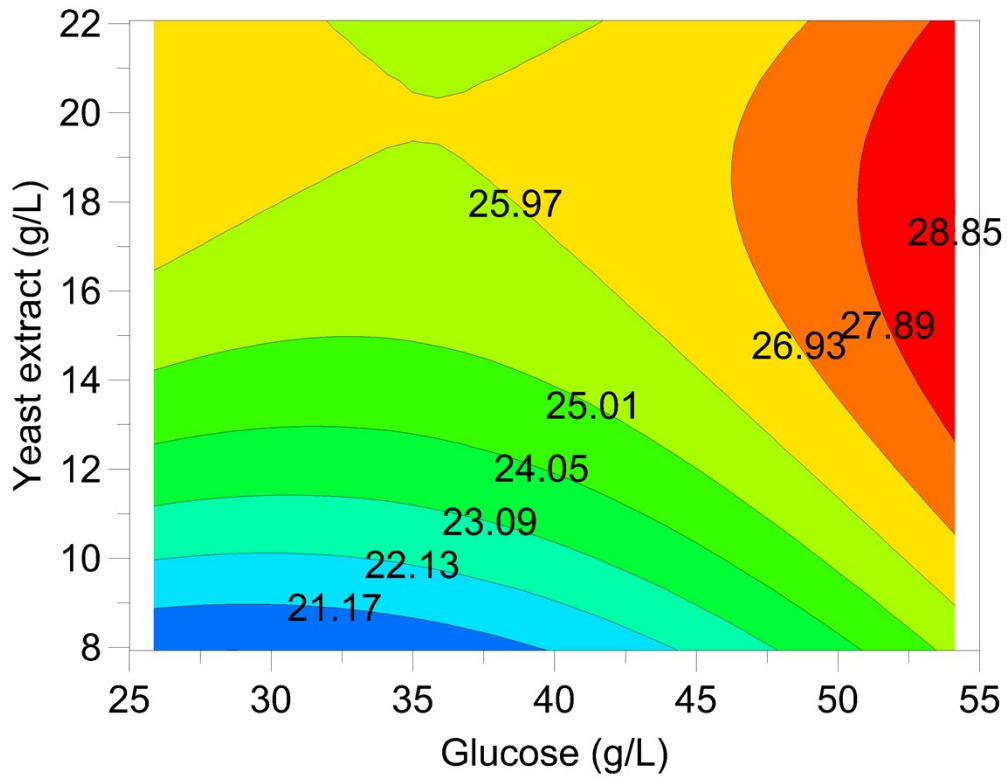

**Fig. 4** Contour plot of biomass production as a function of glucose and yeast extract concentration from submerged cultivation of *P. ostreatus* LGAM 1123.

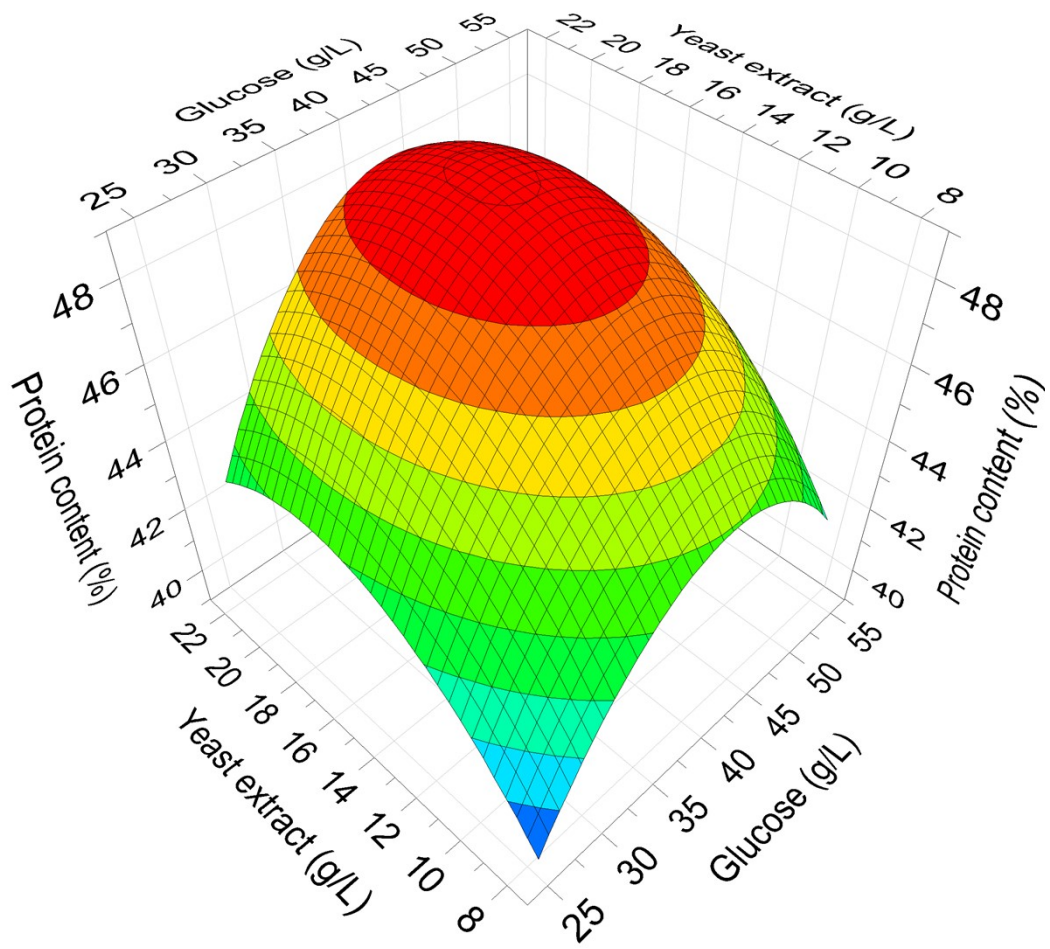

**Fig. 5** 3D surface plot of protein content as a function of glucose and yeast extract concentration from submerged cultivation of *P. ostreatus* LGAM 1123.

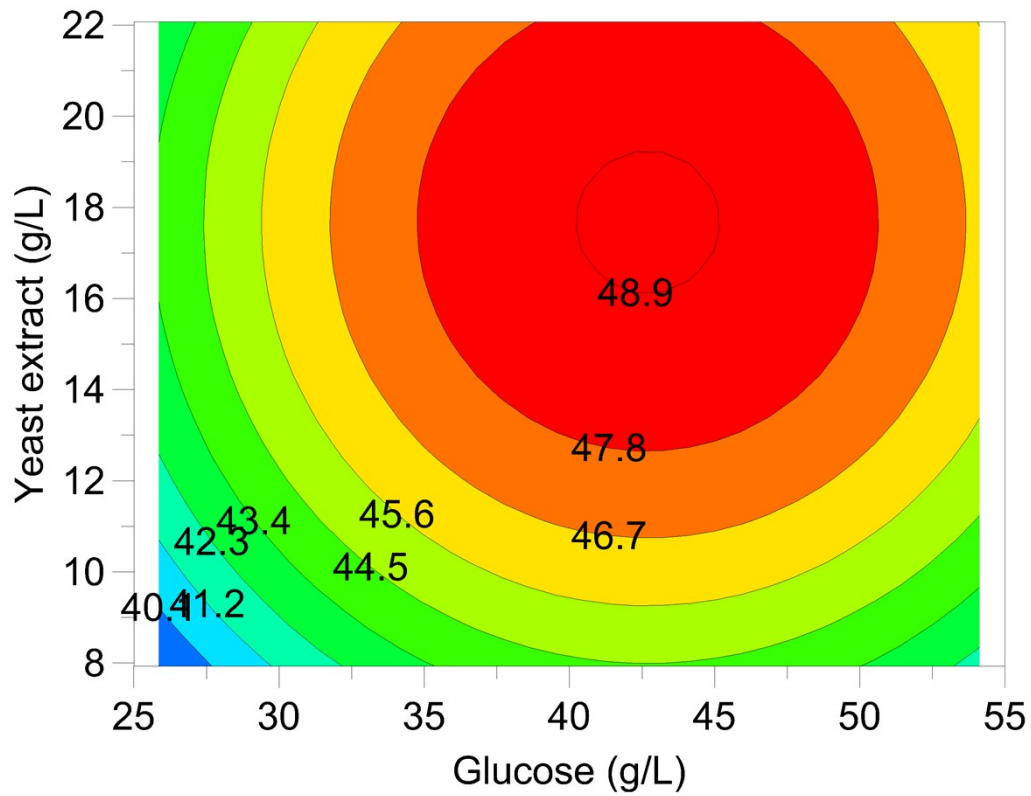

**Fig. 6** Contour plot of protein content as a function of glucose and yeast extract concentration from submerged cultivation of *P. ostreatus* LGAM 1123.

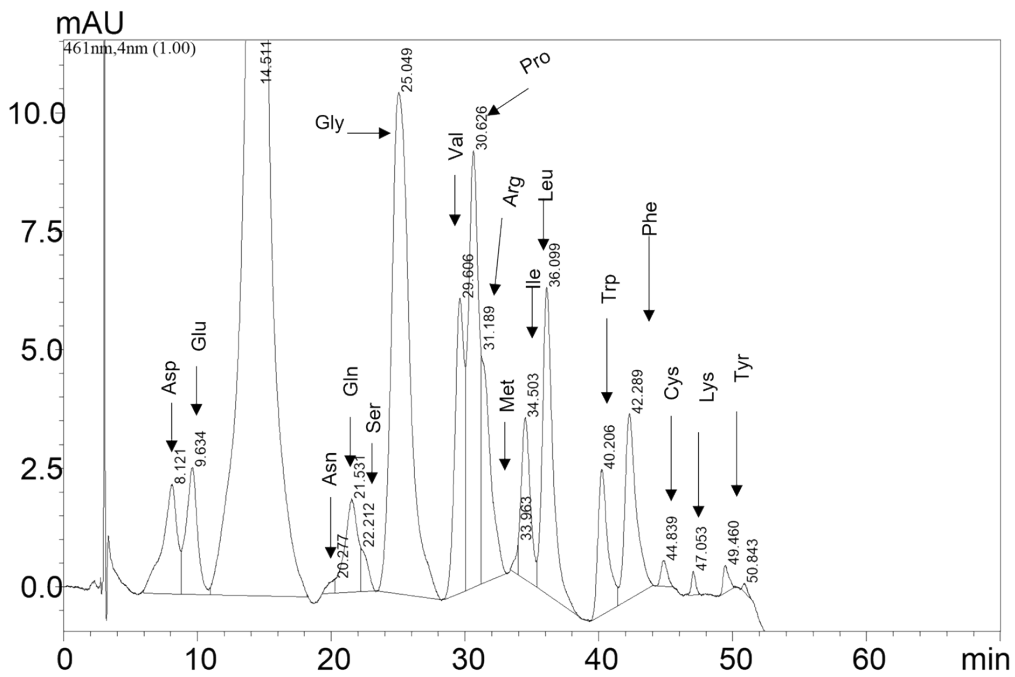

**Fig. 7** HPLC chromatogram for amino acid analysis using Dabsyl derivatization method from submerged cultivation of *P. ostreatus* LGAM 1123, at Glucose ( $54.14 \text{ g L}^{-1}$ ) and yeast extract ( $18.14 \text{ g L}^{-1}$ ).
